# Supplementary material for: Integrating network pharmacology and experimental verification to reveal the anti-inflammatory ingredients and molecular mechanism of pycnogenol
Source: Front Pharmacol. 2024 Jun 26;15:1408304. doi: 10.3389/fphar.2024.1408304 (PMC11233470; doi:10.3389/fphar.2024.1408304)
Supplement: Supplementary file 6 [file Table5.XLSX]

## Sheet: Sheet1
Category	Term	Count	%	PValue	Genes	List Total	Pop Hits	Pop Total	Fold Enrichment	Bonferroni	Benjamini	FDR
GOTERM_BP_DIRECT	GO:0006954~inflammatory response	27	31.7647	4.09566e-23	4790, 6696, 7124, 6774, 2353, 7040, 114548, 2920, 3576, 3553, 6347, 4843, 959, 4780, 5970, 6401, 7412, 3552, 3551, 3569, 1401, 1147, 5742, 207, 5743, 3605, 3627	85	428	19414	14.4084	8.76472e-20	8.76472e-20	7.66708e-20
GOTERM_BP_DIRECT	GO:0010628~positive regulation of gene expression	27	31.7647	3.80283e-21	7422, 7124, 6774, 2152, 7040, 3458, 3479, 1950, 1432, 3576, 3553, 5599, 857, 4846, 3091, 5594, 4780, 5970, 7157, 3552, 2932, 3569, 1401, 3565, 207, 5468, 4317	85	512	19414	12.0445	8.13806e-18	4.06903e-18	3.55945e-18
GOTERM_BP_DIRECT	GO:0045944~positive regulation of transcription from RNA polymerase II promoter	35	41.1765	1.4707e-19	4790, 4792, 7422, 7124, 6772, 5465, 6774, 2353, 2099, 7040, 114548, 154, 3558, 3479, 1432, 3553, 2908, 1956, 3659, 3091, 4780, 5970, 7157, 3552, 3551, 23411, 3569, 1147, 3565, 3586, 207, 5468, 3725, 3605, 3627	85	1222	19414	6.54173	3.1473e-16	1.0491e-16	9.17718e-17
GOTERM_BP_DIRECT	GO:0045893~positive regulation of transcription, DNA-templated	28	32.9412	1.57207e-18	4790, 6696, 7124, 6772, 5465, 6774, 2353, 2099, 7040, 3479, 1950, 1277, 3553, 1956, 3659, 3091, 5970, 7157, 3551, 3569, 653361, 1147, 3565, 3586, 348, 207, 5468, 3725	85	724	19414	8.83315	3.36423e-15	8.41058e-16	7.3573e-16
GOTERM_BP_DIRECT	GO:1902895~positive regulation of pri-miRNA transcription from RNA polymerase II promoter	13	15.2941	4.33884e-18	3091, 7015, 5970, 7124, 7157, 6774, 2353, 7040, 3586, 2908, 5468, 1956, 3725	85	53	19414	56.0226	9.28512e-15	1.85702e-15	1.62446e-15
GOTERM_BP_DIRECT	GO:0043066~negative regulation of apoptotic process	24	28.2353	2.41266e-17	4790, 7422, 4353, 5970, 7124, 7157, 3551, 23411, 5728, 331, 2932, 3558, 3569, 596, 3479, 3565, 3586, 5599, 207, 836, 847, 959, 1956, 4318	85	522	19414	10.5011	5.1631e-14	8.28137e-15	7.24426e-15
GOTERM_BP_DIRECT	GO:0009410~response to xenobiotic stimulus	19	22.3529	2.70886e-17	5243, 7124, 6772, 7157, 4982, 2353, 7040, 3162, 596, 1277, 3586, 5743, 4313, 5468, 6647, 836, 847, 1636, 3725	85	253	19414	17.1526	5.79696e-14	8.28137e-15	7.24426e-15
GOTERM_BP_DIRECT	GO:0071222~cellular response to lipopolysaccharide	17	20	1.287e-16	4790, 5054, 5970, 7124, 3552, 114548, 2920, 3569, 1432, 3576, 3553, 3586, 5599, 834, 6347, 4843, 3627	85	190	19414	20.4358	2.37588e-13	3.44273e-14	3.01158e-14
GOTERM_BP_DIRECT	GO:0001666~response to hypoxia	16	18.8235	2.72059e-16	3091, 7422, 7124, 5465, 7412, 3552, 7040, 3162, 4313, 857, 836, 4843, 5327, 847, 1803, 1636	85	161	19414	22.6981	4.75175e-13	6.46896e-14	5.65883e-14
GOTERM_BP_DIRECT	GO:0071276~cellular response to cadmium ion	11	12.9412	4.14808e-16	653361, 5594, 1147, 2353, 5599, 207, 6647, 3162, 1956, 4318, 3725	85	37	19414	67.9027	9.50351e-13	8.87689e-14	7.7652e-14
GOTERM_BP_DIRECT	GO:0071356~cellular response to tumor necrosis factor	15	17.6471	7.79713e-16	4790, 4780, 5594, 4792, 5970, 7412, 2353, 3551, 23411, 1147, 1432, 3576, 1277, 6347, 207	85	137	19414	25.0073	1.66311e-12	1.5169e-13	1.32693e-13
GOTERM_BP_DIRECT	GO:0010629~negative regulation of gene expression	19	22.3529	9.15219e-16	3091, 4790, 7015, 7422, 7124, 6774, 2099, 23411, 7040, 2932, 3458, 3479, 3576, 348, 207, 5468, 4843, 4317, 1636	85	309	19414	14.044	1.9007e-12	1.63214e-13	1.42774e-13
GOTERM_BP_DIRECT	GO:0032496~response to lipopolysaccharide	14	16.4706	4.31556e-14	7056, 4353, 6401, 5444, 7412, 2353, 6590, 841, 3553, 5743, 836, 4843, 4846, 1636	85	143	19414	22.3608	9.24216e-11	7.10407e-12	6.2144e-12
GOTERM_BP_DIRECT	GO:0006915~apoptotic process	22	25.8824	1.22421e-13	4790, 5594, 4792, 7157, 4982, 3552, 114548, 5728, 596, 653361, 3458, 841, 1432, 3553, 2908, 834, 6647, 836, 4318, 3659, 3725, 3605	85	616	19414	8.15714	2.62059e-10	1.87129e-11	1.63694e-11
GOTERM_BP_DIRECT	GO:0001525~angiogenesis	16	18.8235	2.61431e-13	3091, 5054, 7422, 23411, 3162, 5728, 1950, 841, 1432, 3576, 6347, 5743, 4313, 857, 4846, 3725	85	255	19414	14.331	5.59519e-10	3.72975e-11	3.26266e-11
GOTERM_BP_DIRECT	GO:0043065~positive regulation of apoptotic process	17	20	6.60722e-13	7124, 7157, 23411, 7040, 3162, 3569, 596, 841, 5599, 5743, 4313, 5468, 6647, 836, 4318, 1636, 3725	85	327	19414	11.874	1.41388e-09	8.83716e-11	7.73045e-11
GOTERM_BP_DIRECT	GO:0034614~cellular response to reactive oxygen species	10	11.7647	7.41899e-13	653361, 5594, 1147, 2353, 5599, 4313, 207, 1956, 4318, 3725	85	50	19414	45.68	1.58756e-09	9.3392e-11	8.16962e-11
GOTERM_BP_DIRECT	GO:0045766~positive regulation of angiogenesis	13	15.2941	5.8788e-12	3091, 5054, 4780, 7015, 7422, 6774, 3552, 2152, 23411, 3162, 3576, 3553, 4846	85	164	19414	18.1049	1.25807e-08	6.98924e-10	6.11395e-10
GOTERM_BP_DIRECT	GO:0031663~lipopolysaccharide-mediated signaling pathway	9	10.5882	9.14457e-12	5594, 4792, 7124, 1432, 3553, 6347, 207, 7040, 4846	85	42	19414	48.9429	1.95694e-08	1.02997e-09	9.00981e-10
GOTERM_BP_DIRECT	GO:0042542~response to hydrogen peroxide	9	10.5882	1.11956e-11	596, 6772, 1277, 4313, 6647, 23411, 836, 847, 3162	85	43	19414	47.8047	2.39586e-08	1.19793e-09	1.04791e-09
GOTERM_BP_DIRECT	GO:0071456~cellular response to hypoxia	12	14.1176	1.35245e-11	5728, 3091, 596, 7015, 7422, 7157, 2353, 5468, 5743, 23411, 7040, 3162	85	134	19414	20.4537	2.89425e-08	1.37821e-09	1.20561e-09
GOTERM_BP_DIRECT	GO:0048661~positive regulation of smooth muscle cell proliferation	9	10.5882	1.40447e-10	3569, 3479, 7124, 6772, 4313, 207, 5743, 7040, 3162	85	58	19414	35.4414	3.00557e-07	1.36617e-08	1.19508e-08
GOTERM_BP_DIRECT	GO:0050728~negative regulation of inflammatory response	11	12.9412	6.80651e-10	4790, 3558, 5465, 3565, 3586, 6774, 348, 5468, 6647, 114548, 240	85	145	19414	17.3269	1.45659e-06	6.06913e-08	5.30907e-08
GOTERM_BP_DIRECT	GO:0007568~aging	11	12.9412	6.80651e-10	4780, 4353, 3586, 7412, 2353, 4313, 5743, 6647, 847, 7040, 1636	85	145	19414	17.3269	1.45659e-06	6.06913e-08	5.30907e-08
GOTERM_BP_DIRECT	GO:0008284~positive regulation of cell proliferation	17	20	1.17837e-09	7422, 5970, 23411, 7040, 5728, 3558, 3569, 596, 3458, 3479, 1950, 3565, 3553, 207, 1803, 1956, 3627	85	541	19414	7.17708	2.52171e-06	1.00868e-07	8.82363e-08
GOTERM_BP_DIRECT	GO:0071260~cellular response to mechanical stimulus	9	10.5882	1.29754e-09	4790, 841, 1277, 3553, 5599, 834, 5743, 7040, 3659	85	76	19414	27.0474	2.77672e-06	1.06797e-07	9.34226e-08
GOTERM_BP_DIRECT	GO:0030335~positive regulation of cell migration	13	15.2941	1.35498e-09	7422, 6774, 2152, 7040, 3479, 1950, 3565, 1277, 3553, 4313, 857, 1956, 4318	85	262	19414	11.3328	2.89965e-06	1.07395e-07	9.39453e-08
GOTERM_BP_DIRECT	GO:0051092~positive regulation of NF-kappaB transcription factor activity	11	12.9412	2.40372e-09	1147, 5970, 7124, 3553, 6774, 3551, 857, 847, 7040, 114548, 959	85	165	19414	15.2267	5.14394e-06	1.83713e-07	1.60706e-07
GOTERM_BP_DIRECT	GO:0006979~response to oxidative stress	10	11.7647	2.80979e-09	4780, 4353, 7157, 348, 5742, 5599, 207, 5743, 23411, 3162	85	122	19414	18.7213	6.01293e-06	2.07343e-07	1.81377e-07
GOTERM_BP_DIRECT	GO:0042127~regulation of cell proliferation	11	12.9412	3.39822e-09	331, 4792, 6772, 6774, 5742, 23411, 4843, 7040, 1956, 3627, 3725	85	171	19414	14.6924	7.27216e-06	2.42406e-07	2.12049e-07
GOTERM_BP_DIRECT	GO:0098586~cellular response to virus	9	10.5882	5.07991e-09	3569, 3091, 4790, 3458, 1147, 1432, 7040, 114548, 3627	85	90	19414	22.84	1.08709e-05	3.50678e-07	3.06761e-07
GOTERM_BP_DIRECT	GO:0033138~positive regulation of peptidyl-serine phosphorylation	9	10.5882	6.05757e-09	3569, 596, 7422, 7124, 207, 5743, 857, 7040, 1956	85	92	19414	22.3435	1.29631e-05	4.051e-07	3.54368e-07
GOTERM_BP_DIRECT	GO:0007249~I-kappaB kinase/NF-kappaB signaling	8	9.41176	1.12024e-08	4790, 4792, 1147, 5970, 7124, 3553, 207, 3551	85	64	19414	28.55	2.39728e-05	7.0509e-07	6.16789e-07
GOTERM_BP_DIRECT	GO:0032731~positive regulation of interleukin-1 beta production	8	9.41176	1.12024e-08	3569, 3458, 7124, 841, 6774, 834, 114548, 3605	85	64	19414	28.55	2.39728e-05	7.0509e-07	6.16789e-07
GOTERM_BP_DIRECT	GO:0032757~positive regulation of interleukin-8 production	8	9.41176	1.25108e-08	3569, 5054, 5970, 7124, 3553, 6774, 2152, 4843	85	65	19414	28.1108	2.67728e-05	7.64947e-07	6.6915e-07
GOTERM_BP_DIRECT	GO:0032755~positive regulation of interleukin-6 production	9	10.5882	1.48908e-08	3569, 3458, 7124, 3553, 6774, 3552, 4843, 4317, 3605	85	103	19414	19.9573	3.18659e-05	8.85178e-07	7.74324e-07
GOTERM_BP_DIRECT	GO:0035994~response to muscle stretch	6	7.05882	1.98022e-08	4790, 4792, 5970, 1432, 2353, 3725	85	20	19414	68.52	4.23758e-05	1.14532e-06	1.00188e-06
GOTERM_BP_DIRECT	GO:0019221~cytokine-mediated signaling pathway	10	11.7647	2.17984e-08	3569, 5970, 6772, 3553, 6774, 3552, 6347, 207, 857, 2152	85	154	19414	14.8312	4.66475e-05	1.19612e-06	1.04632e-06
GOTERM_BP_DIRECT	GO:0043524~negative regulation of neuron apoptotic process	10	11.7647	2.17984e-08	3091, 596, 7015, 3586, 348, 6347, 6647, 23411, 3162, 3725	85	154	19414	14.8312	4.66475e-05	1.19612e-06	1.04632e-06
GOTERM_BP_DIRECT	GO:0050729~positive regulation of inflammatory response	9	10.5882	2.33007e-08	3558, 5054, 3458, 4792, 7124, 3553, 834, 114548, 1636	85	109	19414	18.8587	4.98622e-05	1.24659e-06	1.09047e-06
GOTERM_BP_DIRECT	GO:0006508~proteolysis	14	16.4706	3.10731e-08	7056, 2152, 841, 4312, 834, 5644, 4313, 4314, 836, 5327, 1803, 4317, 4318, 1636	85	422	19414	7.57725	6.64942e-05	1.62186e-06	1.41875e-06
GOTERM_BP_DIRECT	GO:0001938~positive regulation of endothelial cell proliferation	8	9.41176	3.44499e-08	3091, 1950, 7422, 3586, 207, 23411, 2152, 3725	85	75	19414	24.3627	7.372e-05	1.7553e-06	1.53548e-06
GOTERM_BP_DIRECT	GO:0010888~negative regulation of lipid storage	5	5.88235	4.04139e-08	3569, 1401, 4792, 7124, 5468	85	9	19414	126.889	8.6482e-05	2.0113e-06	1.75941e-06
GOTERM_BP_DIRECT	GO:0045429~positive regulation of nitric oxide biosynthetic process	7	8.23529	4.46372e-08	3458, 7124, 3553, 2099, 207, 5743, 4317	85	46	19414	34.7565	9.55191e-05	2.17099e-06	1.89911e-06
GOTERM_BP_DIRECT	GO:0070374~positive regulation of ERK1 and ERK2 cascade	11	12.9412	4.67489e-08	5728, 3479, 7422, 7124, 348, 3552, 6347, 7040, 3383, 1956, 3725	85	225	19414	11.1662	0.000100038	2.22317e-06	1.94476e-06
GOTERM_BP_DIRECT	GO:0043536~positive regulation of blood vessel endothelial cell migration	7	8.23529	6.59538e-08	3091, 4780, 7422, 207, 23411, 7040, 4846	85	49	19414	32.6286	0.000141131	2.97448e-06	2.60197e-06
GOTERM_BP_DIRECT	GO:1902894~negative regulation of pri-miRNA transcription from RNA polymerase II promoter	6	7.05882	6.67172e-08	3091, 5970, 5465, 2099, 5468, 7040	85	25	19414	54.816	0.000142765	2.97448e-06	2.60197e-06
GOTERM_BP_DIRECT	GO:0051000~positive regulation of nitric-oxide synthase activity	6	7.05882	6.67172e-08	3091, 7015, 7124, 348, 2099, 207	85	25	19414	54.816	0.000142765	2.97448e-06	2.60197e-06
GOTERM_BP_DIRECT	GO:0010875~positive regulation of cholesterol efflux	6	7.05882	1.0069e-07	4792, 5444, 348, 5468, 857, 23411	85	27	19414	50.7556	0.000215453	4.39503e-06	3.84463e-06
GOTERM_BP_DIRECT	GO:1903799~negative regulation of production of miRNAs involved in gene silencing by miRNA	5	5.88235	1.05149e-07	7015, 7124, 7157, 2099, 7040	85	11	19414	103.818	0.000224994	4.39503e-06	3.84463e-06
GOTERM_BP_DIRECT	GO:1904707~positive regulation of vascular smooth muscle cell proliferation	7	8.23529	1.06795e-07	3479, 7015, 7124, 3586, 4313, 4318, 3725	85	53	19414	30.166	0.000228516	4.39503e-06	3.84463e-06
GOTERM_BP_DIRECT	GO:0043491~protein kinase B signaling	7	8.23529	1.06795e-07	5728, 3479, 7124, 3553, 6347, 207, 7040	85	53	19414	30.166	0.000228516	4.39503e-06	3.84463e-06
GOTERM_BP_DIRECT	GO:0031334~positive regulation of protein complex assembly	7	8.23529	1.19731e-07	2932, 3458, 7422, 7124, 4312, 4314, 7040	85	54	19414	29.6074	0.000256192	4.83443e-06	4.229e-06
GOTERM_BP_DIRECT	GO:0032355~response to estradiol	8	9.41176	1.32887e-07	841, 1277, 6774, 2099, 5743, 836, 847, 7040	85	91	19414	20.0791	0.000284337	5.26625e-06	4.60674e-06
GOTERM_BP_DIRECT	GO:0010575~positive regulation of vascular endothelial growth factor production	6	7.05882	1.75939e-07	3569, 3091, 3553, 3552, 5743, 7040	85	30	19414	45.68	0.000376439	6.84563e-06	5.98832e-06
GOTERM_BP_DIRECT	GO:0006955~immune response	14	16.4706	2.07011e-07	7124, 3552, 6590, 3558, 2920, 3458, 1147, 3565, 3576, 3553, 3586, 6347, 959, 3605	85	497	19414	6.4338	0.000442906	7.91079e-06	6.9201e-06
GOTERM_BP_DIRECT	GO:0050727~regulation of inflammatory response	8	9.41176	3.12014e-07	331, 5970, 6401, 834, 2099, 5743, 114548, 240	85	103	19414	17.7398	0.000667488	1.17142e-05	1.02472e-05
GOTERM_BP_DIRECT	GO:0097192~extrinsic apoptotic signaling pathway in absence of ligand	6	7.05882	3.94052e-07	2932, 596, 3558, 3565, 3553, 3552	85	35	19414	39.1543	0.000842915	1.44407e-05	1.26322e-05
GOTERM_BP_DIRECT	GO:0007165~signal transduction	21	24.7059	3.98131e-07	3091, 5594, 6696, 6772, 6774, 4982, 2099, 114548, 2932, 3479, 1432, 3576, 3553, 3586, 2908, 834, 6347, 207, 5468, 1956, 3627	85	1283	19414	3.73843	0.000851638	1.44407e-05	1.26322e-05
GOTERM_BP_DIRECT	GO:0045471~response to ethanol	8	9.41176	4.04967e-07	3558, 7124, 841, 5465, 7412, 2353, 6647, 847	85	107	19414	17.0766	0.000866253	1.44438e-05	1.2635e-05
GOTERM_BP_DIRECT	GO:2000352~negative regulation of endothelial cell apoptotic process	6	7.05882	4.56059e-07	5054, 4780, 7015, 3565, 3586, 3383	85	36	19414	38.0667	0.00097549	1.59994e-05	1.39958e-05
GOTERM_BP_DIRECT	GO:2001240~negative regulation of extrinsic apoptotic signaling pathway in absence of ligand	6	7.05882	5.25532e-07	596, 7015, 7124, 3553, 3552, 207	85	37	19414	37.0378	0.00112401	1.81393e-05	1.58677e-05
GOTERM_BP_DIRECT	GO:0008285~negative regulation of cell proliferation	13	15.2941	6.10842e-07	7157, 6774, 3552, 7040, 5728, 3569, 3576, 3553, 3586, 5743, 4846, 3659, 3725	85	457	19414	6.49716	0.00130635	2.07492e-05	1.81507e-05
GOTERM_BP_DIRECT	GO:0035094~response to nicotine	6	7.05882	7.85286e-07	596, 5594, 7412, 4313, 836, 3162	85	40	19414	34.26	0.0016791	2.59466e-05	2.26972e-05
GOTERM_BP_DIRECT	GO:0051091~positive regulation of sequence-specific DNA binding transcription factor activity	8	9.41176	7.88097e-07	5728, 3569, 7124, 3553, 3586, 2099, 5468, 207	85	118	19414	15.4847	0.00168511	2.59466e-05	2.26972e-05
GOTERM_BP_DIRECT	GO:0032868~response to insulin	7	8.23529	8.68328e-07	1432, 5465, 1277, 3586, 2353, 23411, 847	85	75	19414	21.3173	0.0018565	2.81549e-05	2.46289e-05
GOTERM_BP_DIRECT	GO:0032091~negative regulation of protein binding	7	8.23529	9.39515e-07	2932, 5465, 5599, 207, 857, 1636, 6590	85	76	19414	21.0368	0.00200854	3.00084e-05	2.62503e-05
GOTERM_BP_DIRECT	GO:0008217~regulation of blood pressure	7	8.23529	1.01541e-06	5742, 5468, 5743, 6647, 3162, 4846, 1636	85	77	19414	20.7636	0.00217061	3.19555e-05	2.79536e-05
GOTERM_BP_DIRECT	GO:0042981~regulation of apoptotic process	10	11.7647	1.05831e-06	331, 6772, 7157, 841, 348, 834, 2099, 207, 23411, 3627	85	243	19414	9.39918	0.00226223	3.28231e-05	2.87125e-05
GOTERM_BP_DIRECT	GO:0033209~tumor necrosis factor-mediated signaling pathway	7	8.23529	1.09624e-06	4792, 1147, 5970, 7124, 6772, 7157, 3551	85	78	19414	20.4974	0.00234321	3.35137e-05	2.93167e-05
GOTERM_BP_DIRECT	GO:0007566~embryo implantation	6	7.05882	1.13717e-06	6696, 3553, 4313, 5743, 6647, 4318	85	43	19414	31.8698	0.00243058	3.42751e-05	2.99827e-05
GOTERM_BP_DIRECT	GO:0032735~positive regulation of interleukin-12 production	6	7.05882	1.27861e-06	3458, 5970, 1432, 959, 3605, 3659	85	44	19414	31.1455	0.00273249	3.80032e-05	3.3244e-05
GOTERM_BP_DIRECT	GO:0097398~cellular response to interleukin-17	4	4.70588	1.54825e-06	4790, 3553, 6774, 3627	85	6	19414	152.267	0.00330777	4.39785e-05	3.84709e-05
GOTERM_BP_DIRECT	GO:0061419~positive regulation of transcription from RNA polymerase II promoter in response to hypoxia	4	4.70588	1.54825e-06	3091, 4780, 7422, 7157	85	6	19414	152.267	0.00330777	4.39785e-05	3.84709e-05
GOTERM_BP_DIRECT	GO:0050796~regulation of insulin secretion	6	7.05882	1.60295e-06	3569, 3458, 7124, 3553, 4843, 240	85	46	19414	29.7913	0.00342445	4.39785e-05	3.84709e-05
GOTERM_BP_DIRECT	GO:1904646~cellular response to beta-amyloid	6	7.05882	1.60295e-06	154, 2932, 3479, 7124, 7412, 3383	85	46	19414	29.7913	0.00342445	4.39785e-05	3.84709e-05
GOTERM_BP_DIRECT	GO:0071407~cellular response to organic cyclic compound	6	7.05882	1.60295e-06	7124, 6772, 841, 3553, 6347, 7040	85	46	19414	29.7913	0.00342445	4.39785e-05	3.84709e-05
GOTERM_BP_DIRECT	GO:0022617~extracellular matrix disassembly	6	7.05882	1.60295e-06	4312, 4313, 5644, 4314, 4317, 4318	85	46	19414	29.7913	0.00342445	4.39785e-05	3.84709e-05
GOTERM_BP_DIRECT	GO:0071347~cellular response to interleukin-1	7	8.23529	1.69939e-06	3091, 4790, 5970, 3576, 4313, 6347, 3605	85	84	19414	19.0333	0.00363009	4.60341e-05	4.02691e-05
GOTERM_BP_DIRECT	GO:0014823~response to activity	6	7.05882	1.78771e-06	3569, 7124, 3586, 2353, 4313, 847	85	47	19414	29.1574	0.0038184	4.78213e-05	4.18324e-05
GOTERM_BP_DIRECT	GO:1902004~positive regulation of beta-amyloid formation	5	5.88235	1.84514e-06	3458, 5970, 7124, 348, 836	85	21	19414	54.381	0.00394082	4.87481e-05	4.26432e-05
GOTERM_BP_DIRECT	GO:0014068~positive regulation of phosphatidylinositol 3-kinase signaling	7	8.23529	1.9521e-06	653361, 3479, 1950, 7422, 7124, 23411, 847	85	86	19414	18.5907	0.00416879	5.09452e-05	4.45651e-05
GOTERM_BP_DIRECT	GO:0034097~response to cytokine	6	7.05882	1.98883e-06	596, 4790, 5970, 6772, 6401, 2353	85	48	19414	28.55	0.00424706	5.12783e-05	4.48565e-05
GOTERM_BP_DIRECT	GO:0045088~regulation of innate immune response	5	5.88235	2.24775e-06	331, 4780, 841, 348, 3659	85	22	19414	51.9091	0.00479863	5.7264e-05	5.00926e-05
GOTERM_BP_DIRECT	GO:0043123~positive regulation of I-kappaB kinase/NF-kappaB signaling	9	10.5882	2.37025e-06	1147, 5970, 7124, 841, 3553, 3552, 834, 3551, 3162	85	199	19414	10.3296	0.0050595	5.96745e-05	5.22013e-05
GOTERM_BP_DIRECT	GO:0010573~vascular endothelial growth factor production	4	4.70588	2.70096e-06	3569, 3091, 7124, 3553	85	7	19414	130.514	0.00576338	6.72098e-05	5.87929e-05
GOTERM_BP_DIRECT	GO:0001934~positive regulation of protein phosphorylation	9	10.5882	3.92575e-06	3458, 7422, 7124, 3553, 207, 23411, 7040, 1956, 4318	85	213	19414	9.6507	0.00836593	9.65644e-05	8.44713e-05
GOTERM_BP_DIRECT	GO:0000122~negative regulation of transcription from RNA polymerase II promoter	17	20	4.38198e-06	4790, 7422, 5970, 7124, 6772, 7157, 5465, 6774, 2099, 23411, 7040, 3458, 3565, 2908, 5468, 857, 3725	85	988	19414	3.92996	0.00933363	0.000106562	9.32167e-05
GOTERM_BP_DIRECT	GO:0051384~response to glucocorticoid	6	7.05882	4.71721e-06	3569, 596, 7124, 3586, 5743, 836	85	57	19414	24.0421	0.0100441	0.000112165	9.8118e-05
GOTERM_BP_DIRECT	GO:0009612~response to mechanical stimulus	6	7.05882	4.71721e-06	4353, 6772, 1277, 5599, 4313, 5468	85	57	19414	24.0421	0.0100441	0.000112165	9.8118e-05
GOTERM_BP_DIRECT	GO:0043627~response to estrogen	6	7.05882	5.60213e-06	4982, 2099, 4313, 5468, 857, 3162	85	59	19414	23.2271	0.011917	0.000131742	0.000115244
GOTERM_BP_DIRECT	GO:1902042~negative regulation of extrinsic apoptotic signaling pathway via death domain receptors	5	5.88235	6.16833e-06	2932, 5054, 3383, 3162, 4846	85	28	19414	40.7857	0.0131135	0.000143481	0.000125512
GOTERM_BP_DIRECT	GO:0043410~positive regulation of MAPK cascade	8	9.41176	6.53655e-06	154, 3569, 3479, 1950, 7422, 7124, 6647, 4317	85	162	19414	11.279	0.0138909	0.000150411	0.000131574
GOTERM_BP_DIRECT	GO:0006959~humoral immune response	6	7.05882	6.61213e-06	3569, 596, 3458, 7124, 6347, 240	85	61	19414	22.4656	0.0140504	0.000150531	0.00013168
GOTERM_BP_DIRECT	GO:0030225~macrophage differentiation	5	5.88235	8.20185e-06	3458, 7422, 841, 23411, 4318	85	30	19414	38.0667	0.0173989	0.000182833	0.000159936
GOTERM_BP_DIRECT	GO:0045840~positive regulation of mitotic nuclear division	5	5.88235	8.20185e-06	3479, 1950, 7124, 3553, 3552	85	30	19414	38.0667	0.0173989	0.000182833	0.000159936
GOTERM_BP_DIRECT	GO:0001819~positive regulation of cytokine production	6	7.05882	9.76609e-06	3458, 7124, 3553, 3586, 3552, 6647	85	66	19414	20.7636	0.0206826	0.000215458	0.000188475
GOTERM_BP_DIRECT	GO:1900017~positive regulation of cytokine production involved in inflammatory response	5	5.88235	1.06915e-05	3569, 3091, 7124, 6774, 3605	85	32	19414	35.6875	0.0226203	0.000233468	0.00020423
GOTERM_BP_DIRECT	GO:0042531~positive regulation of tyrosine phosphorylation of STAT protein	6	7.05882	1.13144e-05	3569, 3558, 3458, 3479, 7124, 3565	85	68	19414	20.1529	0.0239221	0.000244574	0.000213945
GOTERM_BP_DIRECT	GO:0048662~negative regulation of smooth muscle cell proliferation	5	5.88235	1.21262e-05	3458, 348, 5468, 3162, 4846	85	33	19414	34.6061	0.0256165	0.000254413	0.000222552
GOTERM_BP_DIRECT	GO:0097421~liver regeneration	5	5.88235	1.21262e-05	3569, 7124, 3586, 7040, 3162	85	33	19414	34.6061	0.0256165	0.000254413	0.000222552
GOTERM_BP_DIRECT	GO:0043388~positive regulation of DNA binding	5	5.88235	1.21262e-05	3479, 1950, 5468, 4317, 4318	85	33	19414	34.6061	0.0256165	0.000254413	0.000222552
GOTERM_BP_DIRECT	GO:0071492~cellular response to UV-A	4	4.70588	1.25746e-05	4312, 4313, 4314, 4318	85	11	19414	83.0545	0.0265509	0.000261258	0.00022854
GOTERM_BP_DIRECT	GO:0035924~cellular response to vascular endothelial growth factor stimulus	5	5.88235	1.36979e-05	7422, 5970, 1432, 7412, 207	85	34	19414	33.5882	0.0288882	0.00028186	0.000246562
GOTERM_BP_DIRECT	GO:1901224~positive regulation of NIK/NF-kappaB signaling	6	7.05882	1.39891e-05	5970, 7124, 3553, 114548, 4317, 1956	85	71	19414	19.3014	0.0294931	0.00028511	0.000249405
GOTERM_BP_DIRECT	GO:0018105~peptidyl-serine phosphorylation	8	9.41176	1.55404e-05	2932, 596, 5594, 1147, 1432, 5599, 207, 3551	85	185	19414	9.87676	0.0327099	0.000313741	0.00027445
GOTERM_BP_DIRECT	GO:0030198~extracellular matrix organization	8	9.41176	1.60922e-05	7124, 1277, 4982, 4312, 4313, 4314, 4317, 4318	85	186	19414	9.82366	0.0338514	0.000321845	0.000281539
GOTERM_BP_DIRECT	GO:1903800~positive regulation of production of miRNAs involved in gene silencing by miRNA	4	4.70588	1.67137e-05	3569, 7157, 7040, 1956	85	12	19414	76.1333	0.0351355	0.000331179	0.000289704
GOTERM_BP_DIRECT	GO:0046326~positive regulation of glucose import	5	5.88235	1.93157e-05	4780, 3479, 7015, 1432, 207	85	37	19414	30.8649	0.0404932	0.000375778	0.000328718
GOTERM_BP_DIRECT	GO:0051591~response to cAMP	5	5.88235	1.93157e-05	7056, 6772, 1277, 2353, 5327	85	37	19414	30.8649	0.0404932	0.000375778	0.000328718
GOTERM_BP_DIRECT	GO:0051897~positive regulation of protein kinase B signaling	7	8.23529	2.03699e-05	3479, 1950, 7422, 7124, 2152, 7040, 1956	85	129	19414	12.3938	0.0426556	0.000392717	0.000343536
GOTERM_BP_DIRECT	GO:0043406~positive regulation of MAP kinase activity	6	7.05882	2.08017e-05	1950, 7422, 7124, 3553, 7040, 1956	85	77	19414	17.7974	0.0435399	0.000397462	0.000347686
GOTERM_BP_DIRECT	GO:1901216~positive regulation of neuron death	5	5.88235	2.15171e-05	2932, 3458, 841, 348, 2353	85	38	19414	30.0526	0.0450031	0.000407493	0.000356461
GOTERM_BP_DIRECT	GO:0001937~negative regulation of endothelial cell proliferation	5	5.88235	2.38975e-05	7124, 6772, 348, 857, 240	85	39	19414	29.2821	0.0498555	0.000448601	0.000392421
GOTERM_CC_DIRECT	GO:0005615~extracellular space	46	54.1176	2.36092e-24	6696, 7422, 4353, 7124, 5444, 2152, 7040, 3383, 3162, 6590, 3558, 2920, 3458, 3479, 1950, 3576, 1277, 3553, 834, 6347, 6647, 959, 1956, 1636, 5054, 7056, 6401, 7412, 4982, 3552, 240, 3569, 1401, 3565, 3586, 348, 4312, 5644, 4313, 4314, 5327, 847, 4317, 4318, 3605, 3627	85	1970	20624	5.6656	5.17042e-22	5.17042e-22	4.65102e-22
GOTERM_CC_DIRECT	GO:0005576~extracellular region	43	50.5882	1.28582e-19	4790, 6696, 7422, 4353, 7124, 5444, 7040, 114548, 6590, 3558, 2920, 3458, 3479, 1950, 1432, 3576, 1277, 3553, 6347, 6647, 1636, 5054, 5594, 4982, 3552, 240, 5728, 3569, 1401, 3565, 3586, 348, 4312, 5644, 4313, 4314, 5327, 847, 1803, 4317, 4318, 3605, 3627	85	2184	20624	4.77716	2.81594e-17	1.40797e-17	1.26653e-17
GOTERM_CC_DIRECT	GO:0032991~macromolecular complex	16	18.8235	1.00185e-07	3091, 7124, 6772, 7157, 2099, 23411, 596, 841, 2908, 834, 207, 5743, 6647, 857, 847, 1956	85	685	20624	5.66739	2.19402e-05	7.31349e-06	6.5788e-06
GOTERM_CC_DIRECT	GO:0005737~cytoplasm	44	51.7647	3.77096e-06	4790, 4792, 5243, 7422, 6772, 6774, 2099, 7040, 114548, 331, 596, 1432, 1277, 2908, 5599, 834, 6647, 836, 4843, 1956, 4846, 3659, 3091, 5594, 4780, 7015, 5970, 7157, 3551, 23411, 240, 5728, 2932, 653361, 1147, 841, 348, 5742, 207, 5468, 5743, 4314, 5327, 847	85	5687	20624	1.87726	0.000825501	0.00020646	0.00018572
GOTERM_CC_DIRECT	GO:0045121~membrane raft	9	10.5882	7.08567e-06	7124, 841, 6401, 3551, 857, 836, 3383, 1803, 1956	85	245	20624	8.91313	0.00155056	0.000310353	0.000279176
GOTERM_CC_DIRECT	GO:0031012~extracellular matrix	9	10.5882	1.03285e-05	7422, 1277, 4982, 348, 4312, 4313, 4314, 7040, 4317	85	258	20624	8.46402	0.00225939	0.000333636	0.00030012
GOTERM_CC_DIRECT	GO:0090575~RNA polymerase II transcription factor complex	7	8.23529	1.10664e-05	3091, 4780, 6772, 6774, 2353, 5468, 3725	85	123	20624	13.8085	0.00242063	0.000333636	0.00030012
GOTERM_CC_DIRECT	GO:0009986~cell surface	13	15.2941	1.31066e-05	7056, 5243, 7422, 7124, 7412, 3552, 2152, 7040, 3383, 5327, 1803, 959, 1956	85	654	20624	4.82303	0.00286626	0.000333636	0.00030012
GOTERM_CC_DIRECT	GO:0005901~caveola	6	7.05882	1.37111e-05	5594, 6401, 5743, 857, 3162, 4846	85	75	20624	19.4108	0.00299824	0.000333636	0.00030012
GOTERM_CC_DIRECT	GO:0005654~nucleoplasm	34	40	2.24424e-05	4790, 4792, 5243, 4353, 6772, 5465, 6774, 2353, 2099, 3162, 331, 596, 1432, 2908, 5599, 6647, 836, 4843, 3659, 3091, 5594, 4780, 7015, 5970, 7157, 23411, 240, 5728, 2932, 1147, 841, 207, 5468, 3725	85	4031	20624	2.04654	0.00490288	0.000491489	0.000442115
GOTERM_CC_DIRECT	GO:0000785~chromatin	15	17.6471	8.39726e-05	3091, 4790, 4780, 5970, 6772, 7157, 5465, 6774, 2353, 2099, 23411, 2908, 5468, 3659, 3725	85	1053	20624	3.45634	0.0182227	0.00167182	0.00150387
GOTERM_CC_DIRECT	GO:0009897~external side of plasma membrane	10	11.7647	0.000139108	7056, 7124, 6401, 7412, 2152, 3383, 959, 1636, 3605, 3627	85	477	20624	5.08669	0.0300074	0.00253873	0.00228369
GOTERM_CC_DIRECT	GO:0031093~platelet alpha granule lumen	5	5.88235	0.000161429	5054, 3479, 1950, 7422, 7040	85	67	20624	18.1071	0.034738	0.00271945	0.00244626
GOTERM_CC_DIRECT	GO:0005794~Golgi apparatus	15	17.6471	0.000202203	4780, 5594, 6696, 7412, 2099, 6590, 154, 653361, 1277, 348, 5742, 857, 847, 959, 4846	85	1145	20624	3.17863	0.0433206	0.00316304	0.00284529
GOTERM_MF_DIRECT	GO:0019899~enzyme binding	22	25.8824	1.25414e-17	3091, 4790, 4792, 5970, 6772, 7157, 2099, 23411, 7040, 3162, 6590, 5728, 1432, 348, 5599, 207, 5743, 5468, 857, 847, 1956, 3725	85	380	18945	12.9037	4.40202e-15	4.40202e-15	3.64954e-15
GOTERM_MF_DIRECT	GO:0042802~identical protein binding	36	42.3529	1.11841e-15	4790, 4792, 7422, 7124, 6772, 6774, 2353, 2099, 7040, 3162, 114548, 154, 331, 596, 1277, 2908, 834, 857, 6647, 1956, 5594, 7015, 5970, 7157, 3551, 23411, 5728, 1401, 841, 348, 207, 5468, 847, 1803, 4318, 3725	85	1704	18945	4.70878	3.89688e-13	1.9628e-13	1.62728e-13
GOTERM_MF_DIRECT	GO:0005125~cytokine activity	14	16.4706	2.6387e-12	6696, 7422, 7124, 4982, 3552, 7040, 3558, 3569, 3458, 3565, 3553, 3586, 959, 3605	85	192	18945	16.2518	9.26172e-10	3.08728e-10	2.55954e-10
GOTERM_MF_DIRECT	GO:0042803~protein homodimerization activity	18	21.1765	1.94423e-08	7015, 7422, 5970, 6772, 5444, 6774, 3551, 3162, 154, 596, 1147, 348, 207, 5743, 4843, 847, 1803, 3605	85	736	18945	5.45093	6.82424e-06	1.70607e-06	1.41443e-06
GOTERM_MF_DIRECT	GO:0002020~protease binding	9	10.5882	3.24135e-08	2932, 596, 5054, 7124, 7157, 1277, 836, 2152, 1803	85	111	18945	18.0715	1.13771e-05	2.27542e-06	1.88646e-06
GOTERM_MF_DIRECT	GO:0001223~transcription coactivator binding	7	8.23529	5.15161e-08	3091, 4790, 7015, 5970, 6772, 5465, 2099	85	46	18945	33.9169	1.8082e-05	3.01369e-06	2.49853e-06
GOTERM_MF_DIRECT	GO:0005515~protein binding	78	91.7647	7.19299e-08	7124, 5465, 2353, 2152, 7040, 3162, 114548, 6590, 154, 596, 3558, 3479, 3553, 2908, 834, 6347, 836, 4843, 959, 4846, 3091, 7056, 4780, 5594, 7015, 6401, 4982, 23411, 240, 3569, 1147, 841, 3565, 5742, 207, 5468, 5743, 3725, 3605, 4790, 6696, 4792, 5243, 7422, 4353, 6772, 6774, 2099, 3383, 331, 2920, 3458, 1950, 1432, 3576, 1277, 5599, 857, 6647, 1956, 3659, 5054, 5970, 7157, 3552, 3551, 5728, 2932…	85	12648	18945	1.37451	2.52471e-05	3.60677e-06	2.99023e-06
GOTERM_MF_DIRECT	GO:0000976~transcription regulatory region sequence-specific DNA binding	10	11.7647	9.44825e-07	4790, 4780, 5970, 7124, 7157, 6774, 2353, 5468, 3659, 3725	85	234	18945	9.52489	0.000331579	3.81369e-05	3.16178e-05
GOTERM_MF_DIRECT	GO:0003700~transcription factor activity, sequence-specific DNA binding	14	16.4706	1.11352e-06	3091, 4790, 4780, 5970, 6772, 7157, 5465, 6774, 2353, 2099, 2908, 5468, 3659, 3725	85	563	18945	5.54237	0.000390769	3.81369e-05	3.16178e-05
GOTERM_MF_DIRECT	GO:0004175~endopeptidase activity	7	8.23529	1.16879e-06	4312, 834, 4313, 4314, 4317, 4318, 1636	85	77	18945	20.262	0.000410162	3.81369e-05	3.16178e-05
GOTERM_MF_DIRECT	GO:0031625~ubiquitin protein ligase binding	11	12.9412	1.19517e-06	2932, 3091, 596, 4780, 4792, 5243, 5970, 7157, 841, 1956, 3725	85	312	18945	7.85803	0.000419419	3.81369e-05	3.16178e-05
GOTERM_MF_DIRECT	GO:0004252~serine-type endopeptidase activity	9	10.5882	1.85539e-06	4312, 4313, 5644, 4314, 2152, 5327, 1803, 4317, 4318	85	188	18945	10.6699	0.000651031	5.42702e-05	4.49933e-05
GOTERM_MF_DIRECT	GO:0008233~peptidase activity	7	8.23529	7.18742e-06	841, 4312, 4314, 836, 4317, 4318, 1636	85	105	18945	14.8588	0.00251961	0.00019406	0.000160888
GOTERM_MF_DIRECT	GO:0001228~transcriptional activator activity, RNA polymerase II transcription regulatory region sequence-specific binding	12	14.1176	8.14432e-06	3091, 4790, 4780, 5970, 7157, 5465, 6774, 2353, 2908, 2099, 3659, 3725	85	477	18945	5.6071	0.00285459	0.00020419	0.000169286
GOTERM_MF_DIRECT	GO:0008083~growth factor activity	8	9.41176	9.33954e-06	3569, 3558, 3479, 1950, 7422, 3565, 3586, 7040	85	167	18945	10.677	0.00327283	0.000218545	0.000181187
GOTERM_MF_DIRECT	GO:0061629~RNA polymerase II sequence-specific DNA binding transcription factor binding	8	9.41176	1.63404e-05	2932, 3091, 4780, 7157, 5465, 6774, 2353, 3725	85	182	18945	9.79703	0.0057191	0.000358467	0.00029719
GOTERM_MF_DIRECT	GO:0019903~protein phosphatase binding	6	7.05882	4.96851e-05	7157, 1432, 6774, 5599, 5468, 1956	85	90	18945	14.8588	0.0172887	0.00102585	0.000850492
GOTERM_MF_DIRECT	GO:0020037~heme binding	7	8.23529	6.08428e-05	4353, 5742, 5743, 4843, 847, 3162, 4846	85	153	18945	10.1972	0.02113	0.00118643	0.000983625
GOTERM_MF_DIRECT	GO:0004879~RNA polymerase II transcription factor activity, ligand-activated sequence-specific DNA binding	5	5.88235	9.60573e-05	5465, 6774, 2908, 2099, 5468	85	54	18945	20.6373	0.0331556	0.00177453	0.00147119
GOTERM_MF_DIRECT	GO:0019901~protein kinase binding	11	12.9412	0.000102731	5728, 2932, 3091, 5970, 7157, 6774, 2908, 2099, 207, 3551, 857	85	522	18945	4.69675	0.0354179	0.00180293	0.00149473
GOTERM_MF_DIRECT	GO:0043565~sequence-specific DNA binding	9	10.5882	0.000137474	3091, 596, 4780, 5465, 2353, 2908, 2099, 5468, 114548	85	342	18945	5.86533	0.047111	0.00224223	0.00185894
GOTERM_MF_DIRECT	GO:0004222~metalloendopeptidase activity	6	7.05882	0.000140539	4312, 4313, 4314, 4317, 4318, 1636	85	112	18945	11.9401	0.0481355	0.00224223	0.00185894
